# Supplementary material for: A sensitive flow-injection analysis method with iminodiacetate chelation and spectrophotometric detection for on board determination of trace dissolved aluminum in seawater
Source: Royal Society of Chemistry journal article supplement (doi:10.1039/c6ay01031h), 2016-01-01
Supplement: c6ay01031h1.pdf [file c6ay01031h1.pdf]

ESI Figure Captions:

Fig. S1 Absorption spectra of CAS-CTAB complex solutions with various CTAB concentrations  
(concentration of dAl,  $1000 \text{ nmol}\cdot\text{L}^{-1}$ ; concentration of CAS,  $0.25 \text{ mmol}\cdot\text{L}^{-1}$ ; pH 5.6)

Fig. S2 Calibration curves with different sample loading times

Fig. S3 Intercomparison data of the proposed method and the ICP-MS method
