# Supplementary figures and images for: A sensitive flow-injection analysis method with iminodiacetate chelation and spectrophotometric detection for on board determination of trace dissolved aluminum in seawater
Source: Royal Society of Chemistry journal article supplement (doi:10.1039/c6ay01031h), 2016-01-01

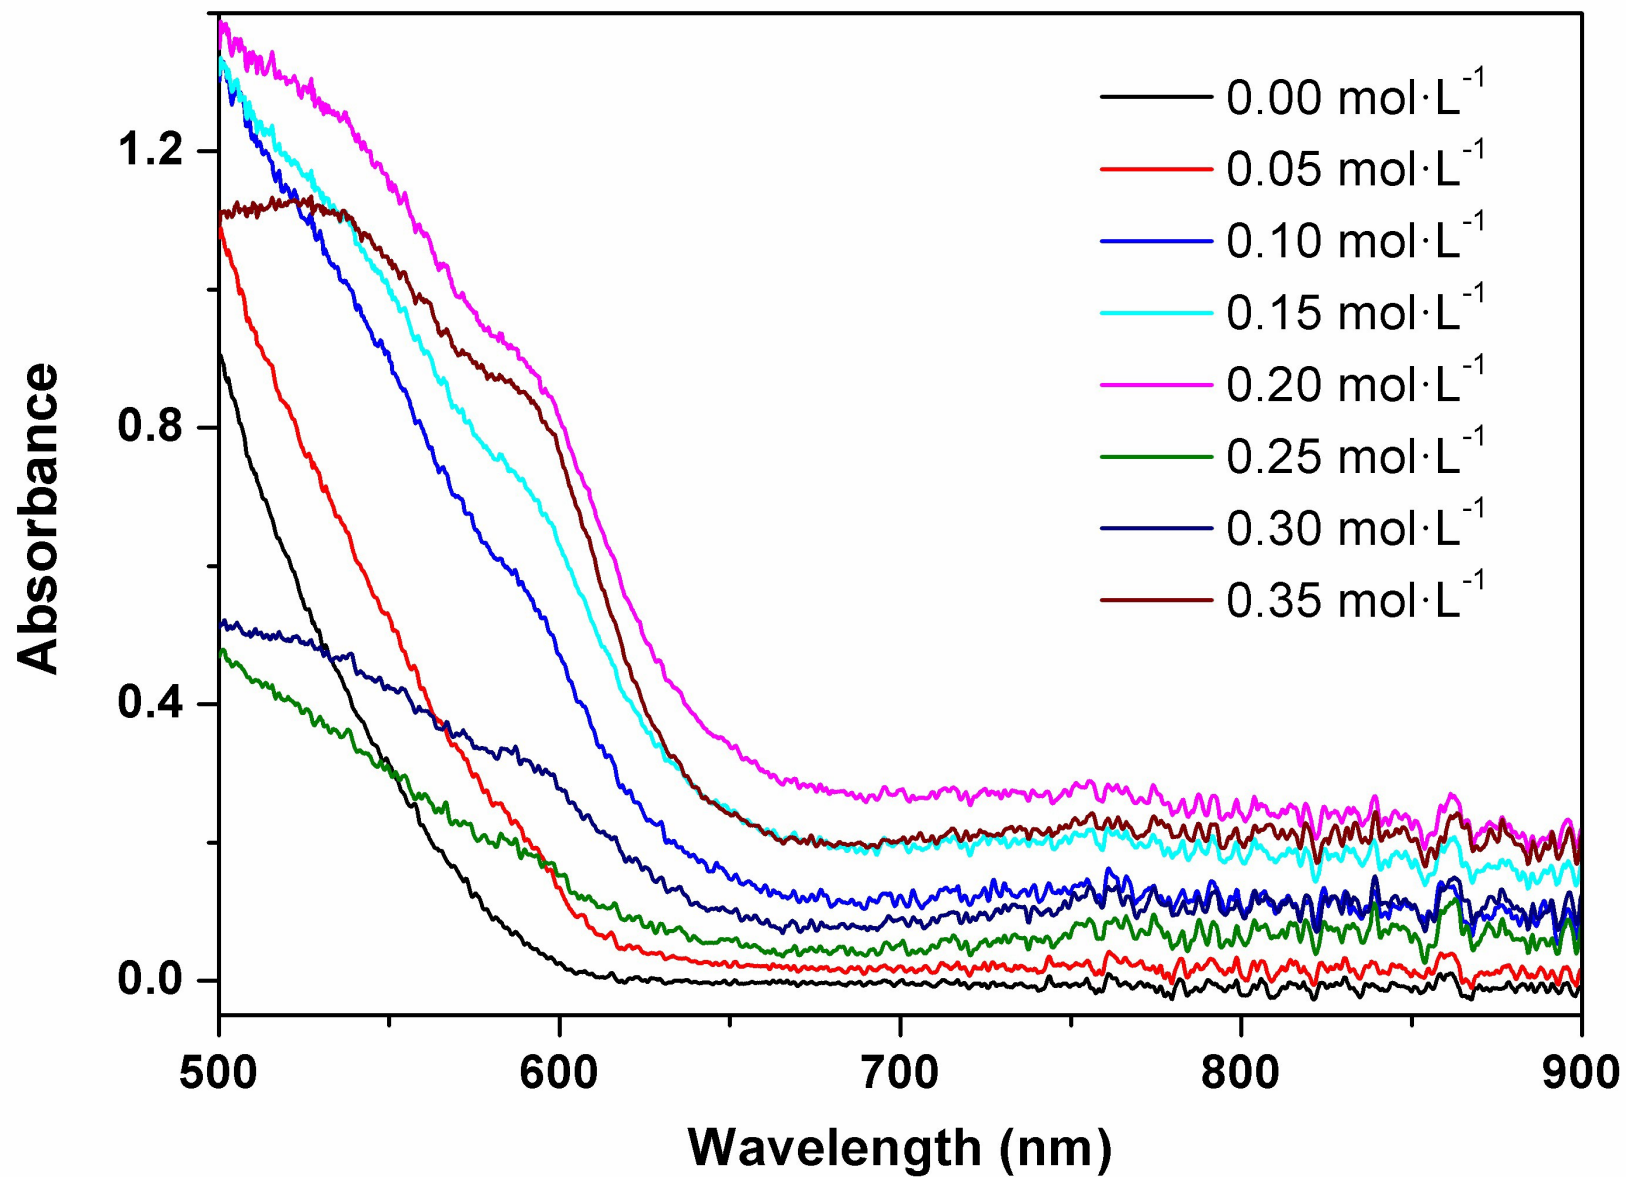

Supplement: c6ay01031h2.pdf [file c6ay01031h2.pdf]

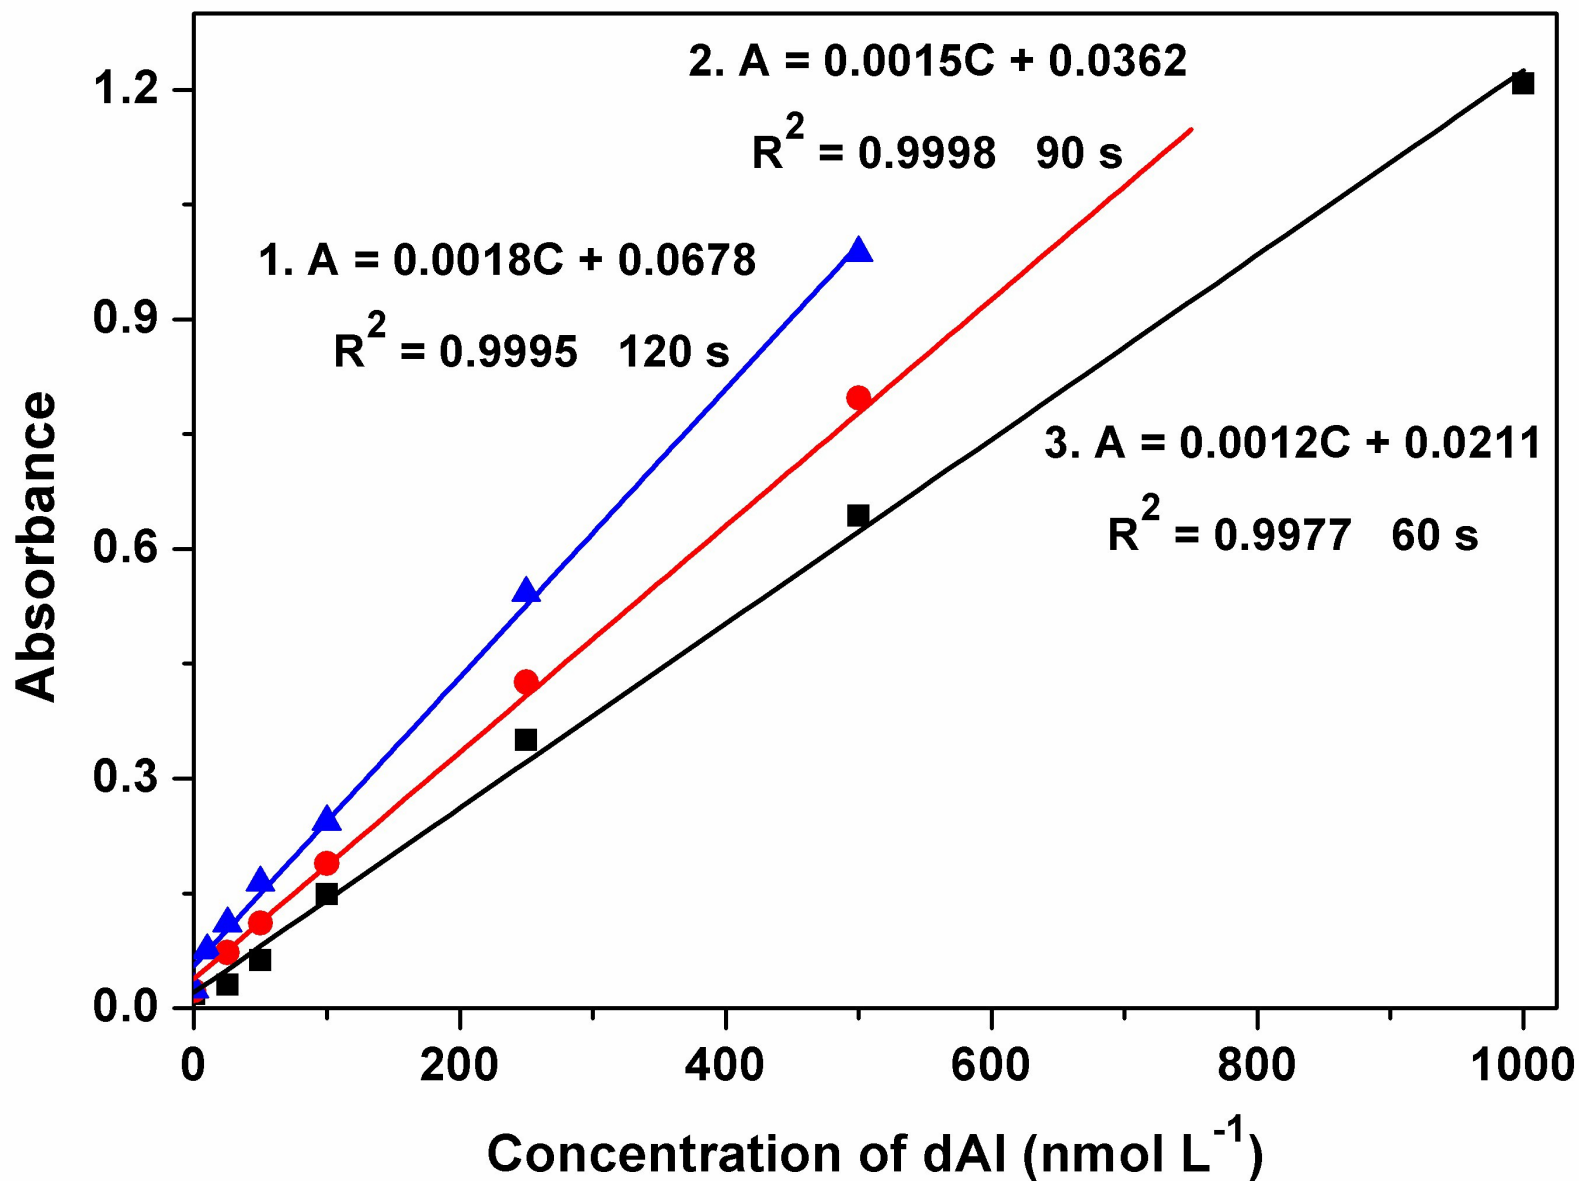

Supplement: c6ay01031h3.pdf [file c6ay01031h3.pdf]

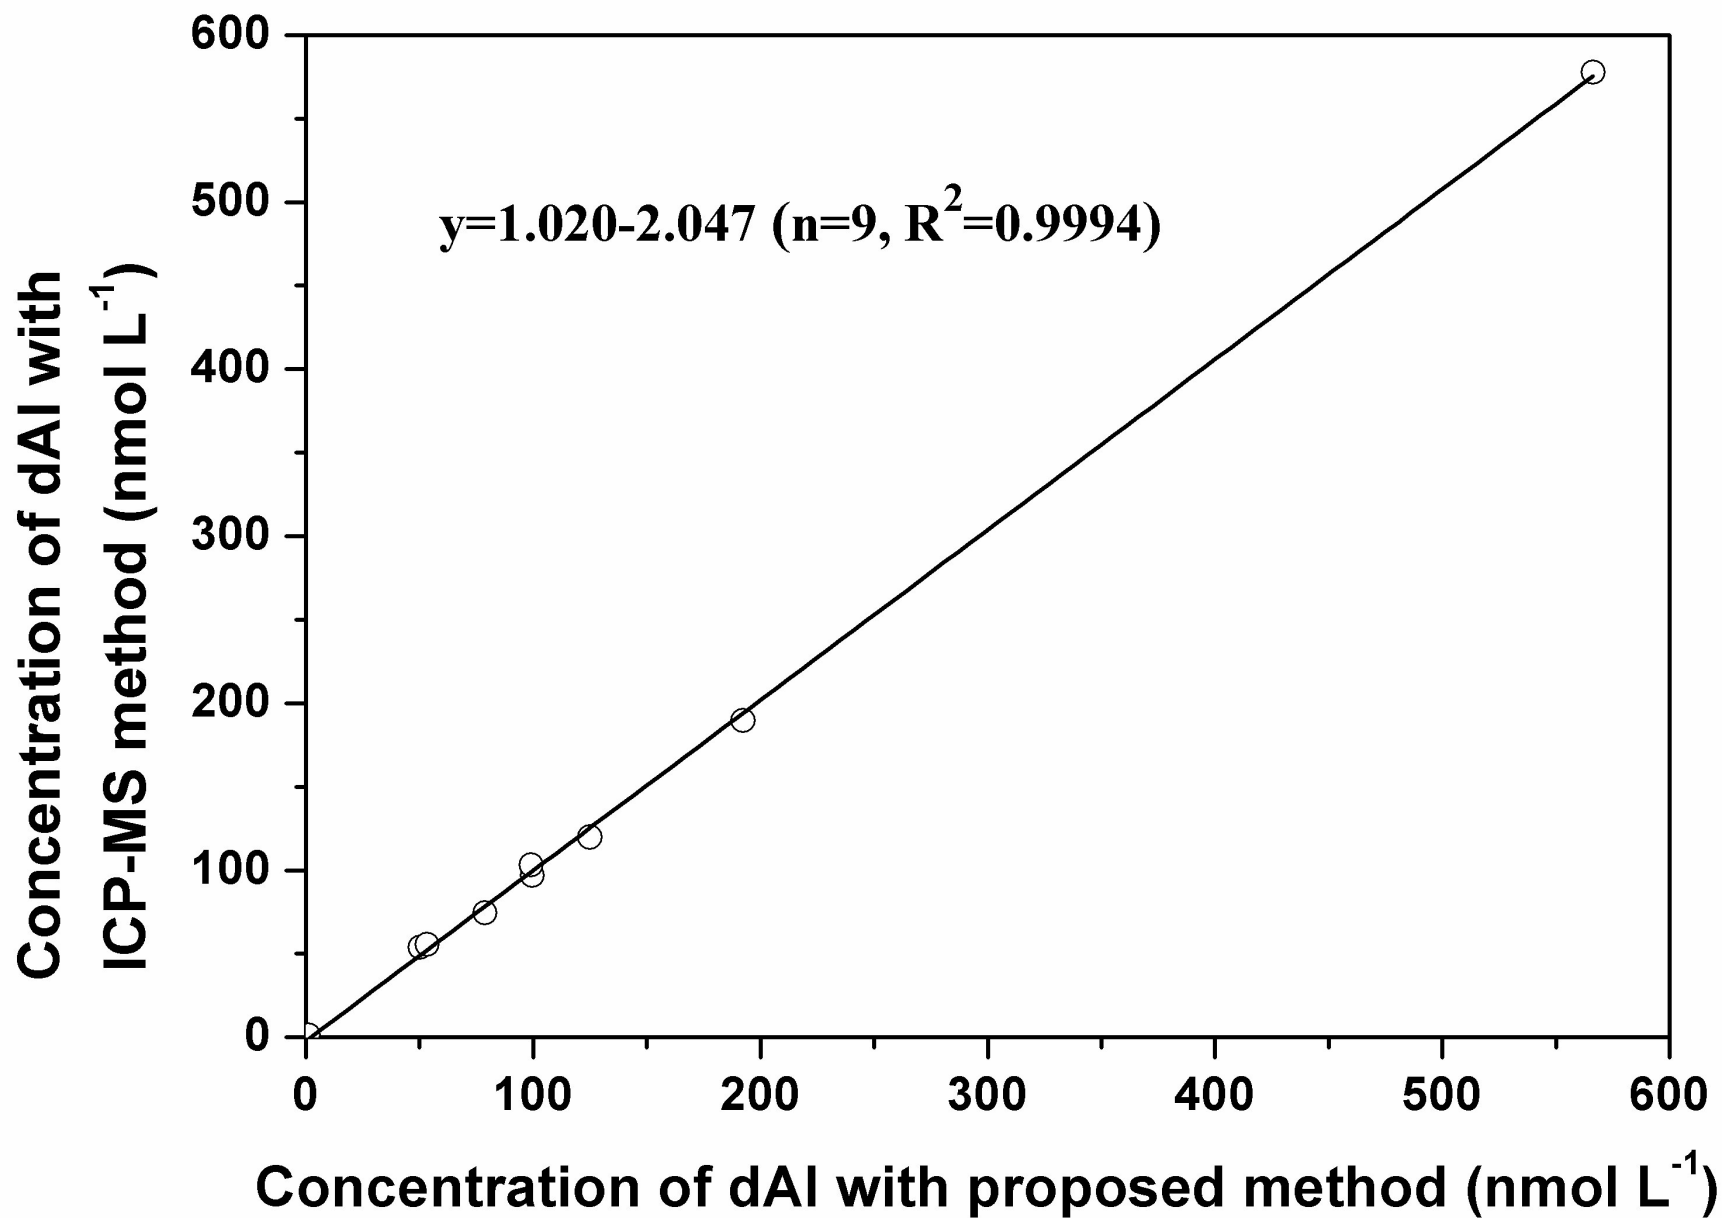

Supplement: c6ay01031h4.pdf [file c6ay01031h4.pdf]
